# Supplementary material
Source: HighWire-hosted journal article supplement (https://jnm.snmjournals.org/highwire/filestream/104233/field_highwire_adjunct_files/1/261926_Supplemental_Figures.pdf)
Supplement: 261926_Supplemental_Figures.pdf [file 261926_Supplemental_Figures.pdf]

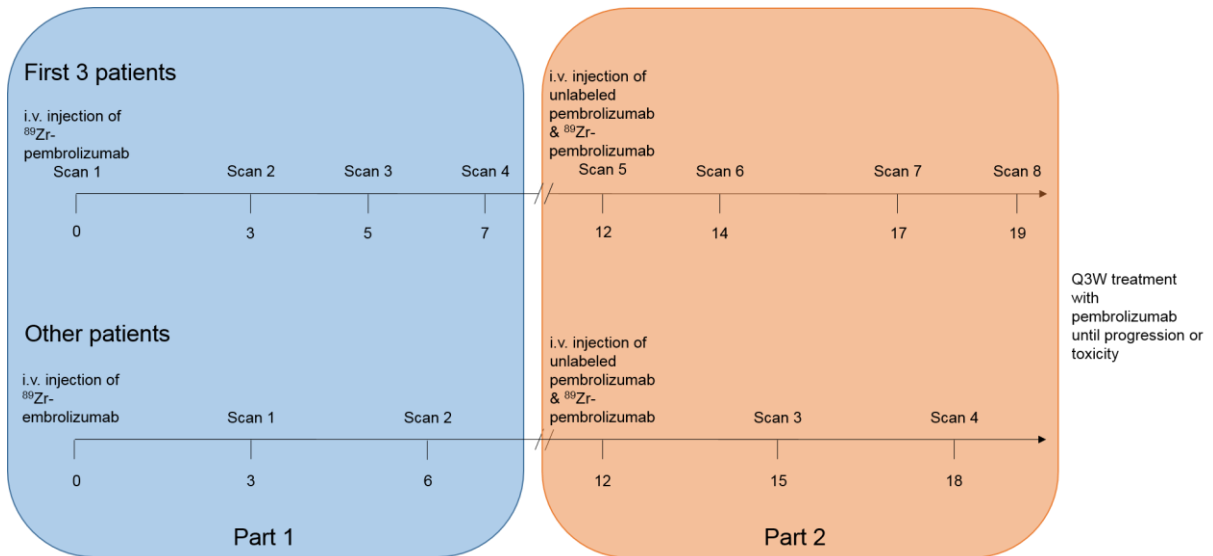

### Supplemental Figure 1

**Study overview.**  $^{89}\text{Zr}$ -pembrolizumab (37 MBq  $\pm$ 10%, 2 mg pembrolizumab) was intravenously (IV) injected on day 0. Static whole body PET/CT scans were performed 1 hour, and 3, 5 and 7 days post injection (p.i.) for the first 3 patients, while all other patients were scanned on day 3 and 6 p.i.. On day 12, patients received an infusion with 200 mg unlabeled pembrolizumab, within two hours followed by a second  $^{89}\text{Zr}$ -pembrolizumab injection, to maximize the chance of representing therapeutic tumor targeting.

*i.v. intravenous  $^{89}\text{Zr}$  labeled pembrolizumab Q3W every three weeks*

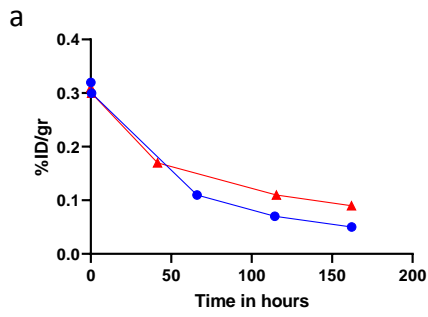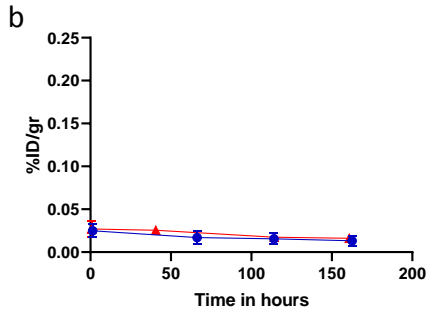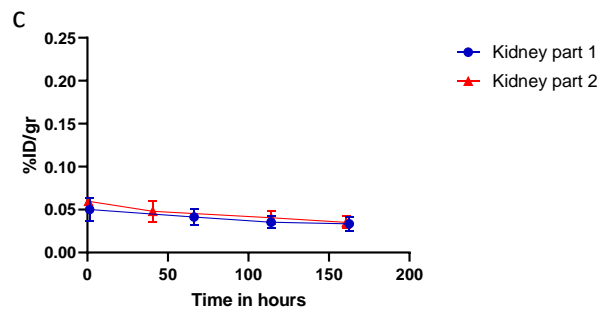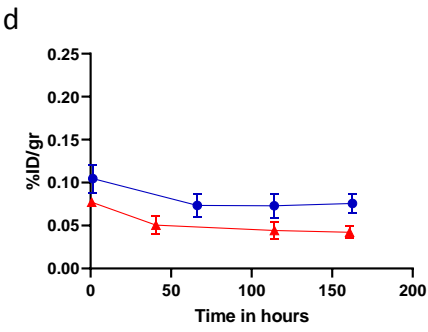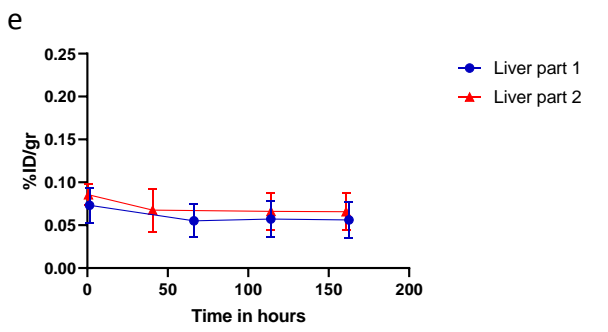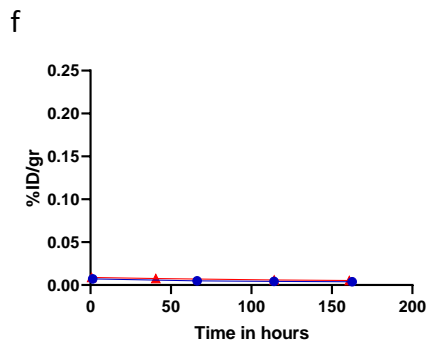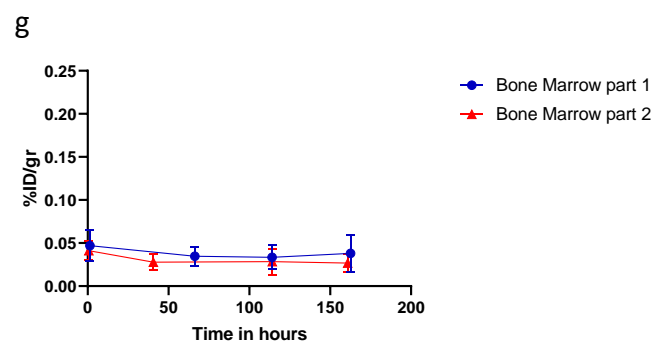

## Supplemental Figure 2

Activity concentrations in first and second imaging acquisition in plasma and in organs.

%ID/gr percentage injected dose per gram tissue

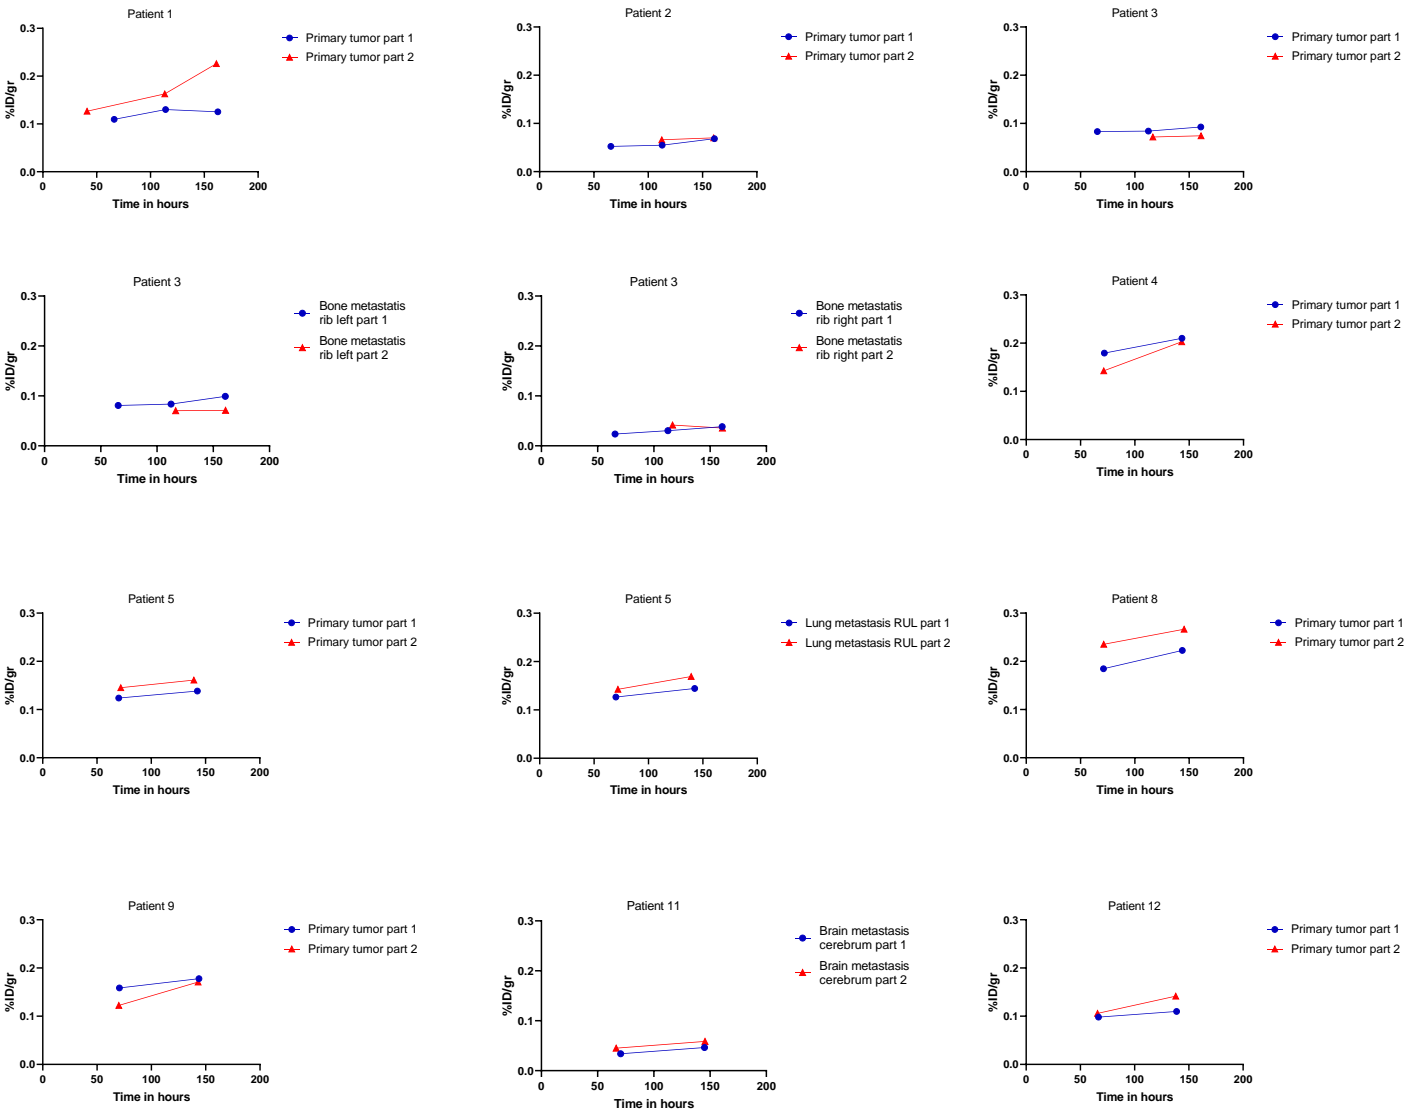

### Supplemental Figure 3

Activity concentrations (in %ID/gr) in first and second imaging acquisition in tumor.

%ID/gr percentage injected dose per gram tissue

a

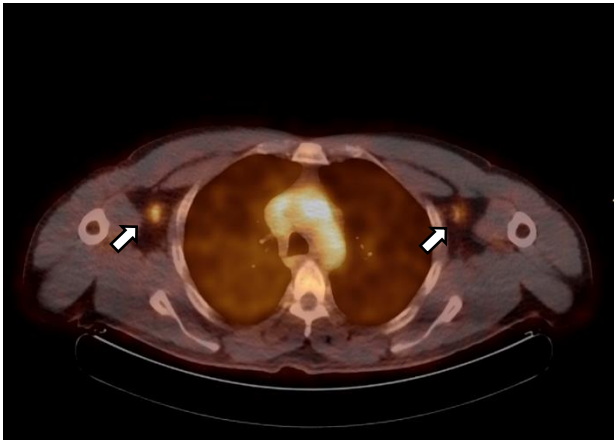

b

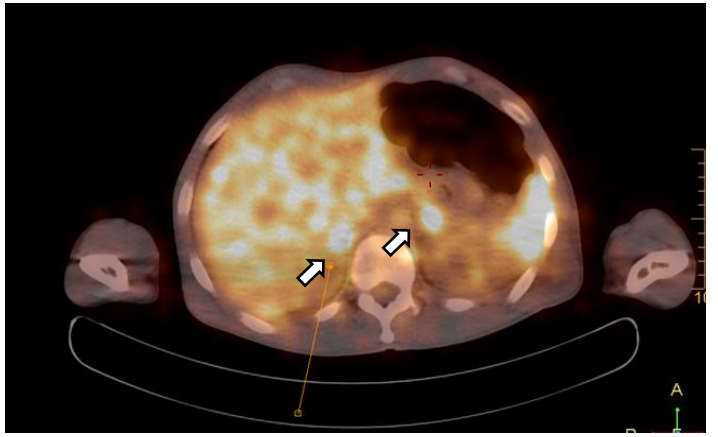

**Supplemental Figure 4**

Non-malignant tissues (axillary lymph nodes, a; adrenal gland, b) showed uptake of  $^{89}\text{Zr}$ -pembrolizumab.
